# Supplementary material for: Antidepressants enter cells, organelles, and membranes
Source: Springer Nature journal article supplement (doi:10.1038/s41386-023-01725-x), 2023-10-02
Supplement: MOESM1 [file 41386_2023_1725_MOESM1_ESM.zip]

Archive with 9 entries (9 files):
- Antidepressants_I (2023-05-29 11_32).cdx
- Antidepressants_I_Protonated form (2023-05-29 11_32).cdx
- Antidepressants_II (2023-05-29 11_32).cdx
- Antidepressants_II_protonated form (2023-05-29 11_32).cdx
- Antidepressants_IV_Cyclohexane_normal confor (2023-05-29 11_32).cdx
- Antidepressants_IV_Cyclohexane_normal conformation_Protonated form (2023-05-29 11_32).cdx
- MAO Inhibitors_V MAO inhibiotrs protonated and deprotonated (2023-08-11).cdx
- Antidepressants_III_protonated form (2023-05-29 11_32).cdx
- Antidepressants_III (2023-08-11 13_32).cdx
